# Supplementary material for: Urea-formaldehyde derived porous carbons for adsorption of CO2
Source: Royal Society of Chemistry journal article supplement (doi:10.1039/c6ra24634f), 2016-01-01
Supplement: c6ra24634f1.pdf [file c6ra24634f1.pdf]

## SUPPORTING INFORMATION

### Urea-formaldehyde derived porous carbons for adsorption of CO<sub>2</sub>

Deepak Tiwari, Haripada Bhunia\*, and Pramod K. Bajpai

[Deepak.tiwari@thapar.edu](mailto:Deepak.tiwari@thapar.edu), [hbhunias@thapar.edu](mailto:hbhunias@thapar.edu), [pramod.iitk77@gmail.com](mailto:pramod.iitk77@gmail.com)

Department of Chemical Engineering, Thapar University, Patiala-147004, Punjab, India

\*Correspondence to: Haripada Bhunia

Email address: [hbhunias@thapar.edu](mailto:hbhunias@thapar.edu)

Phone: +91-9316682355; fax: +91-175-2393005

## 1. Adsorption kinetic models

Kinetics of CO<sub>2</sub> uptake give useful information about the efficiency of the adsorption process. Here three kinetic models were used for to evaluate CO<sub>2</sub> uptake on UFZ-700.

The Lagergren pseudo–first-order model expressed as:<sup>1</sup>

$$q_t = q_e (1 - \exp(-k_f t)) \quad (1)$$

where  $k_f$  : pseudo–first-order model constant (min<sup>-1</sup>).

The pseudo-second order model is given as:<sup>1</sup>

$$q_t = \frac{k_2 q_e^2 t}{1 + k_2 q_e t} \quad (2)$$

where  $k_2$  : pseudo–second-order rate constant (g mmol<sup>-1</sup> min<sup>-1</sup>).

The fractional - order rate model is given as:<sup>2</sup>

$$q_t = q_e - \frac{1}{[(n-1)k_n/m]t^m + (1/q_e^{n-1})]^{1/n-1}} \quad (3)$$

where m and n: model constants.

Coefficient of determination ( $R^2$ ) and error (%) was used for to evaluate accuracy of models,

$$Error (\%) = \sqrt{\frac{\sum [q_{t(\text{exp})} - q_{t(\text{pred})}]^2 / q_{t(\text{exp})}^2}{N-1}} \times 100 \quad (4)$$

where,  $q_{t(\text{pred})}$  and  $q_{t(\text{exp})}$  are the predicted and experimental CO<sub>2</sub> loading, respectively.

## 2. Adsorption isotherm studies

To study the adsorption equilibrium three isotherms Langmuir, Freundlich and Temkin isotherm were analyzed.<sup>3</sup>

Langmuir adsorption isotherm assumes that binding sites are homogeneously distributed over the adsorbent surface. It can be expressed as:

$$q_e = \frac{q_m K_L P}{1 + K_L P} \quad (5)$$

where  $q_m$  : maximum adsorption capacity, mmol g<sup>-1</sup>, and  $K_L$ : Langmuir constant, atm<sup>-1</sup> and it indicate adsorption affinity.

Freundlich adsorption isotherm is an empirical equation used to describe heterogeneous systems. It can be given as:

$$q_e = K_F P^{1/n} \quad (6)$$

where  $K_F$  and  $1/n$  are sorption capacity and sorption intensity, respectively. If the value of  $n > 1$ , it represents favorable adsorption condition.<sup>1</sup>

Temkin isotherm assumes that the heat of adsorption (function of temperature) decrease linearly rather than logarithmic with coverage. The equation can be expressed as follows:

$$q_e = B \ln(K_T P) \quad (7)$$

where  $K_T$  (atm<sup>-1</sup>) and  $B = RT/b$  with  $b$  (J mol<sup>-1</sup>) are the Temkin constants.  $R$  (8.314 J mol<sup>-1</sup> K<sup>-1</sup>) and  $T$  (K) is the temperature.

### 3. Adsorption thermodynamics

The standard Gibbs free energy  $\Delta G^0$  (J mol<sup>-1</sup>), standard molar adsorption enthalpy  $\Delta H^0$  (J mol<sup>-1</sup>), and standard entropy change can be obtained using following equations:

$$\Delta G^0 = -RT \ln(K_{eq}) \quad (8)$$

$$\ln(K_{eq}) = -\frac{\Delta H^0}{R} \frac{1}{T} + \frac{\Delta S^0}{R} \quad (9)$$

where  $K_{eq}$  : equilibrium constant for adsorption.

$\Delta H^0$  and  $\Delta S^0$  can be calculated from the slope and intercept of van't Hoff plot, respectively.<sup>4</sup>

Enthalpy of adsorption can be obtained from isosteric heat of adsorption  $Q_{st}$  which represents strength of adsorbate-adsorbent interaction. The  $Q_{st}$  (kJ mol<sup>-1</sup>) can be expressed by Clausius-clapeyron equation:

$$Q_{st} = -R \left[ \frac{\partial \ln P}{\partial \left( \frac{1}{T} \right)} \right]_{q_e} \quad (10)$$



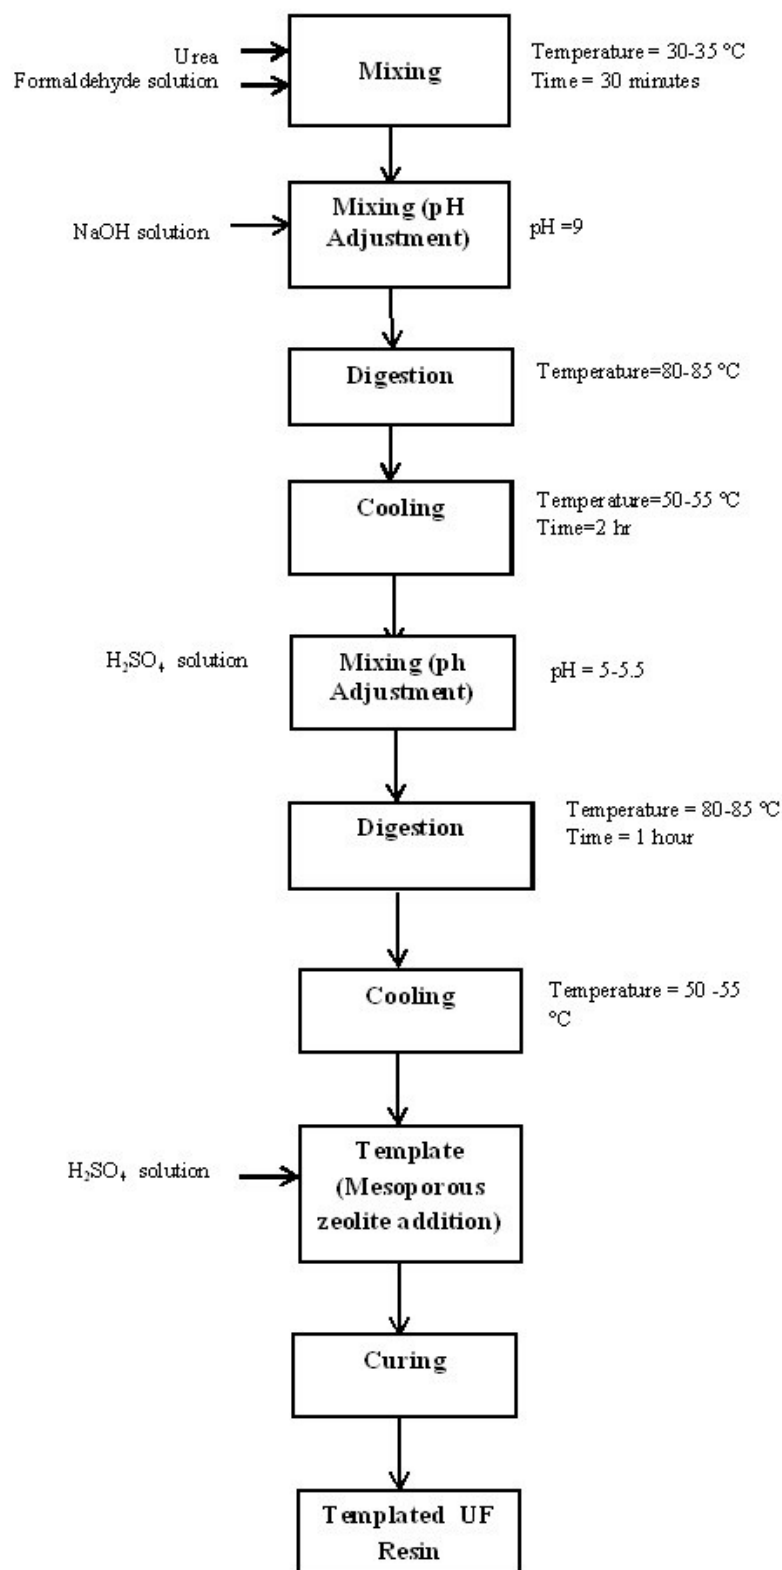

**Fig. S1** Block diagram of preparation method of carbon adsorbents

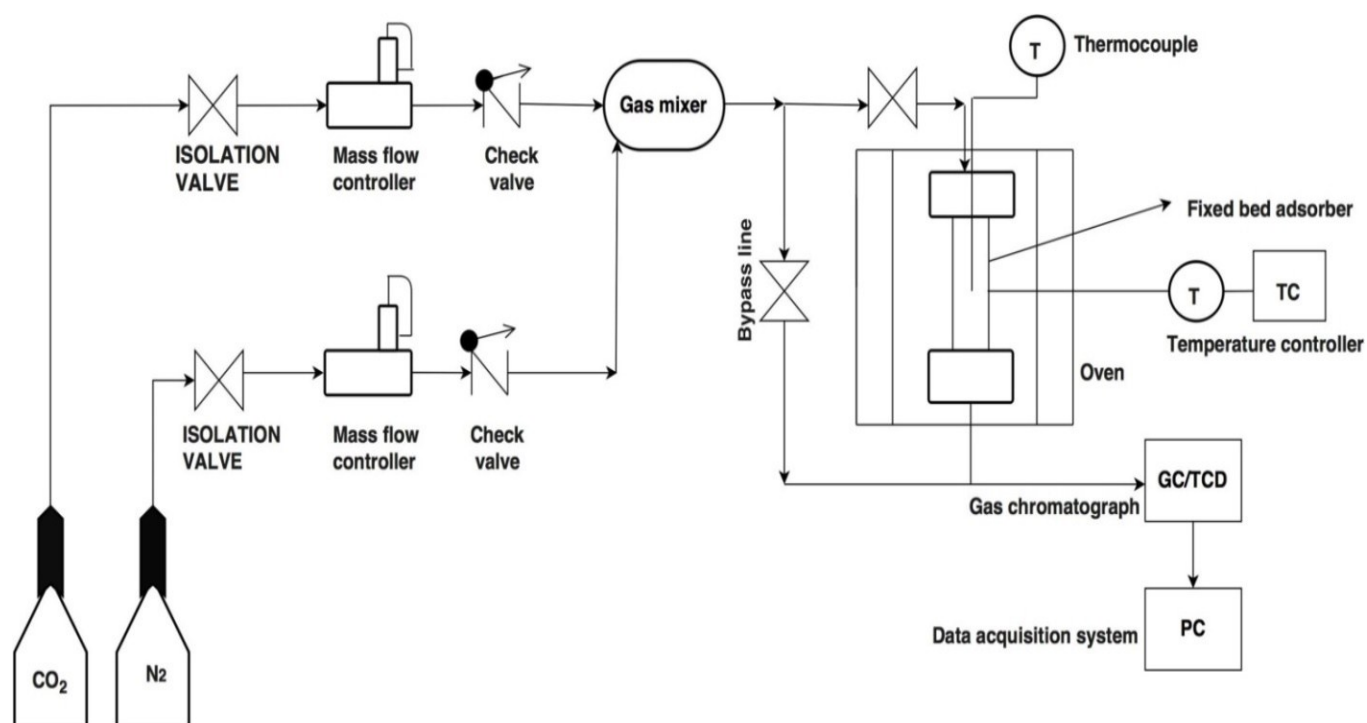

**Fig. S2** Schematic experimental setup used for adsorption–desorption experimental setup<sup>5</sup>

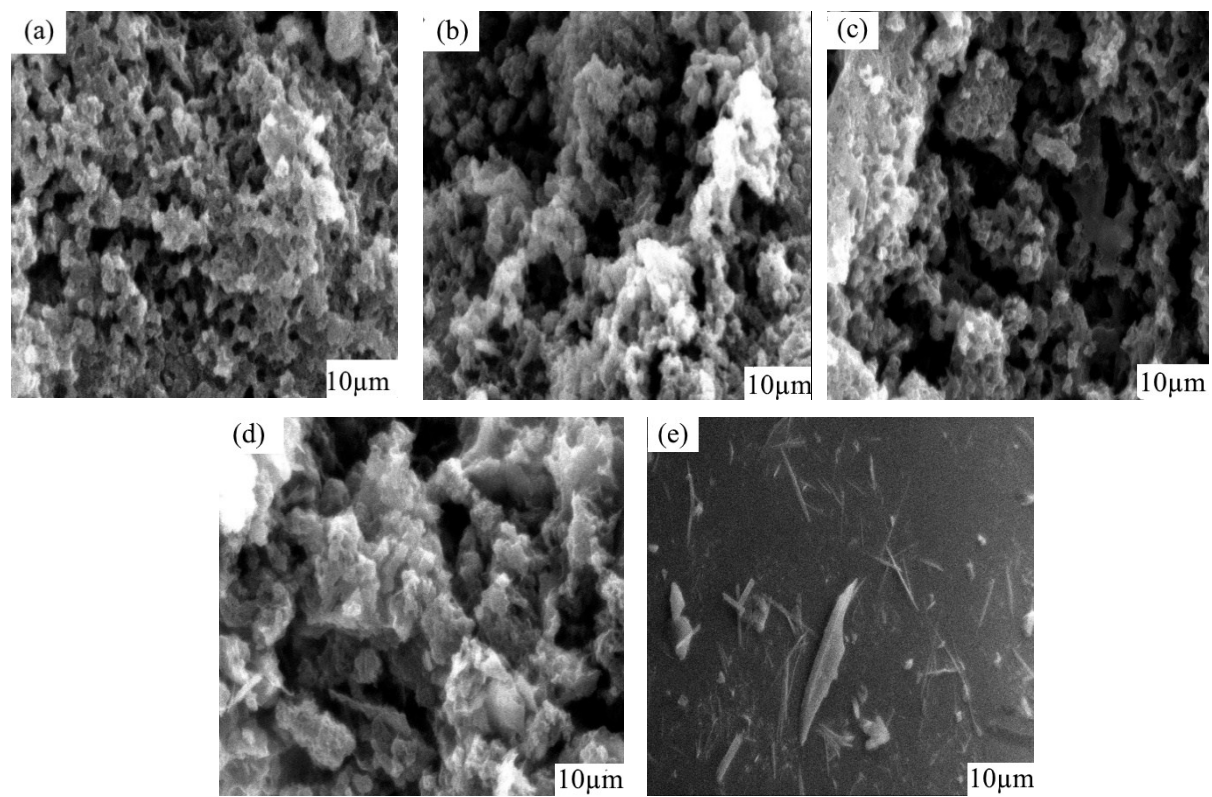

**Fig. S3** SEM images of (a) UFZ-500, (b) UFZ-600, (c) UFZ-700, (d) UFZ-800 and (e) UF-700

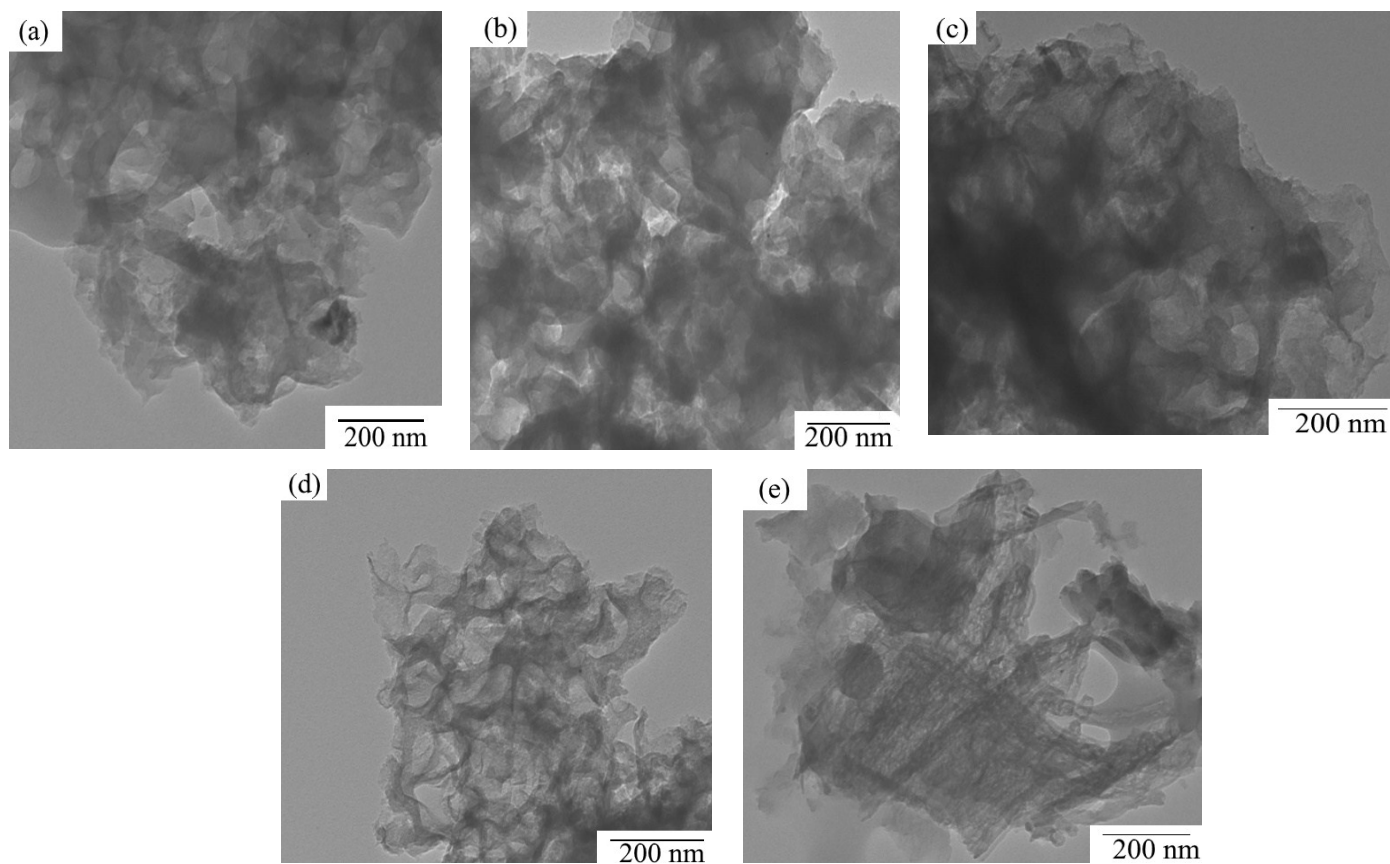

**Fig. S4** TEM images of (a) UFZ-500, (b) UFZ-600, (c) UFZ-700, (d) UFZ-800 and (e) UF-700



## References

1. M.-S. Chiou and H.-Y. Li, *J. Hazard. Mater.*, 2002, 93, 233-248.
2. C. Shen, C. A. Grande, P. Li, J. Yu and A. E. Rodrigues, *Chem. Engin. J.*, 2010, 160, 398-407.
3. M. A. Ahmad, N. A. A. Puad and O. S. Bello, *Water Resour. Indus.*, 2014, 6, 18-35.
4. C. Goel, H. Bhunia and P. K. Bajpai, *RSC Adv.*, 2015, 5, 93563-93578.
5. C. Goel, H. Bhunia and P. K. Bajpai, *J. Environ. Sci.*, 2015, 32, 238-248.
